# Supplementary material for: Safety and efficacy of fruquintinib in patients with previously treated metastatic colorectal cancer: a phase Ib study and a randomized double-blind phase II study
Source: PubMed Central journal article supplement (PMC5244709; doi:10.1186/s13045-016-0384-9), 2017-01-19

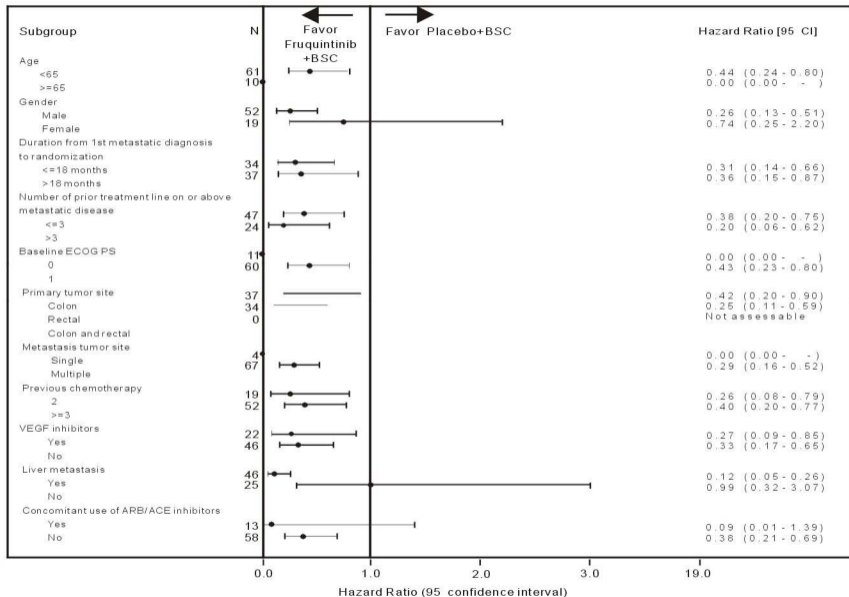

Supplement: 13045_2016_384_MOESM3_ESM.pdf [file 13045_2016_384_MOESM3_ESM.pdf]
