# Supplementary material for: Safety and efficacy of fruquintinib in patients with previously treated metastatic colorectal cancer: a phase Ib study and a randomized double-blind phase II study
Source: Springer Nature journal article supplement (doi:10.1186/s13045-016-0384-9), 2017-01-19

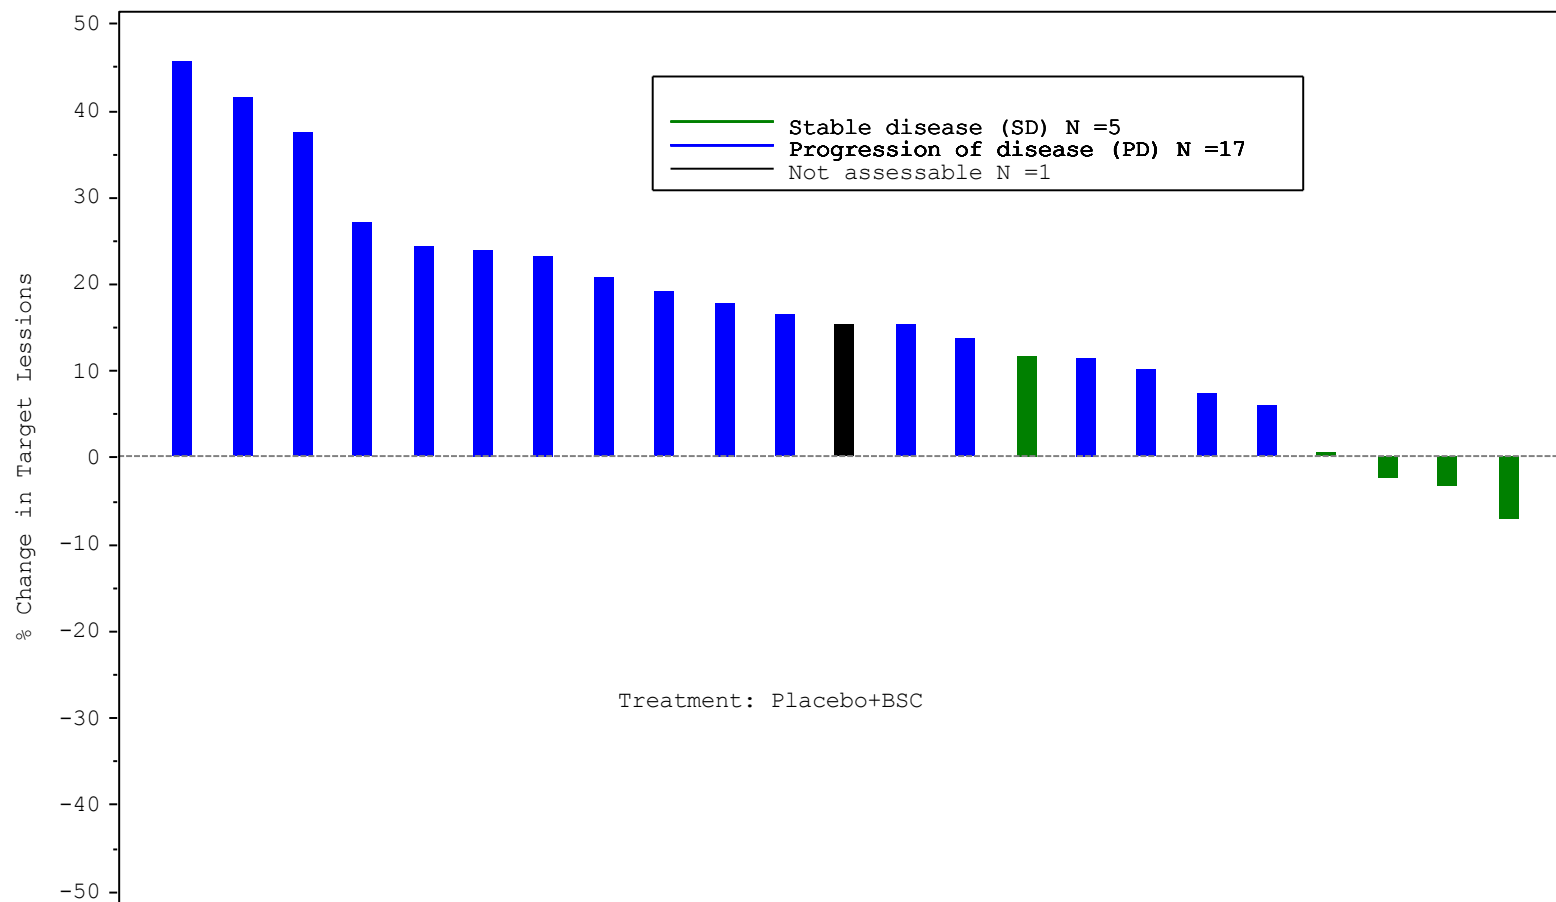

Supplement: MOESM4 [file 12008408]
